# Supplementary material for: Heritable Variation in Courtship Patterns in Drosophila melanogaster
Source: PubMed Central journal article supplement (PMC4390569; doi:10.1534/g3.114.014811), 2015-02-03
Supplement: supp_g3.114.014811_FigureS1.pdf [file supp_g3.114.014811_FigureS1.pdf]

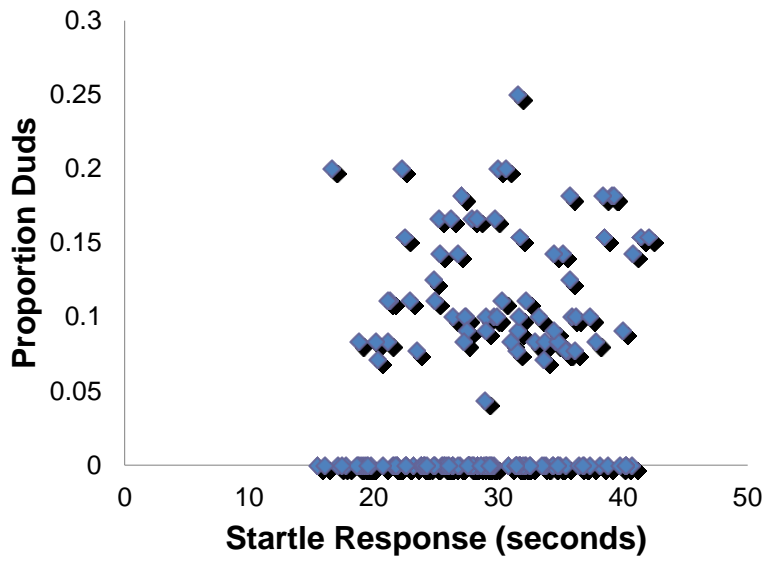

**Figure S1. Low correlation between the proportion of ‘dud’ males and a measure of general locomotor activity, startle response.  $r^2 = 0.0383$ .**
